# Supplementary material for: Antiviral activities of extremophilic actinomycetes extracts from Kazakhstan’s unique ecosystems against influenza viruses and paramyxoviruses
Source: PubMed Central journal article supplement (PMC6889349; doi:10.1186/s12985-019-1254-1), 2019-12-02

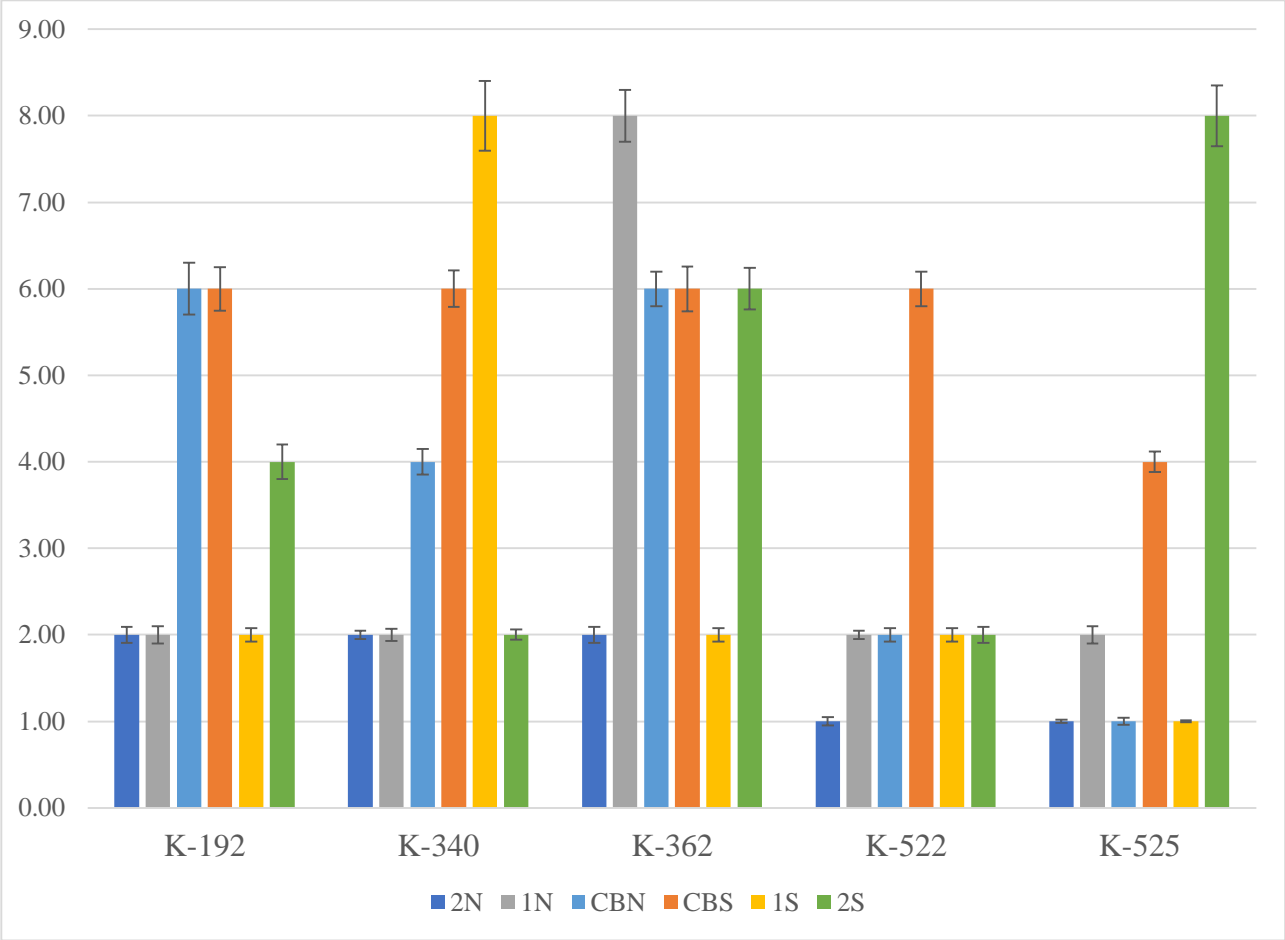

Supplement: 12985_2019_1254_MOESM3_ESM.pdf [file 12985_2019_1254_MOESM3_ESM.pdf]
